# Supplementary material for: CF750-A33scFv-Fc-Based Optical Imaging of Subcutaneous and Orthotopic Xenografts of GPA33-Positive Colorectal Cancer in Mice
Source: Hindawi journal article supplement (doi:10.1155/2015/505183), 2015-01-01

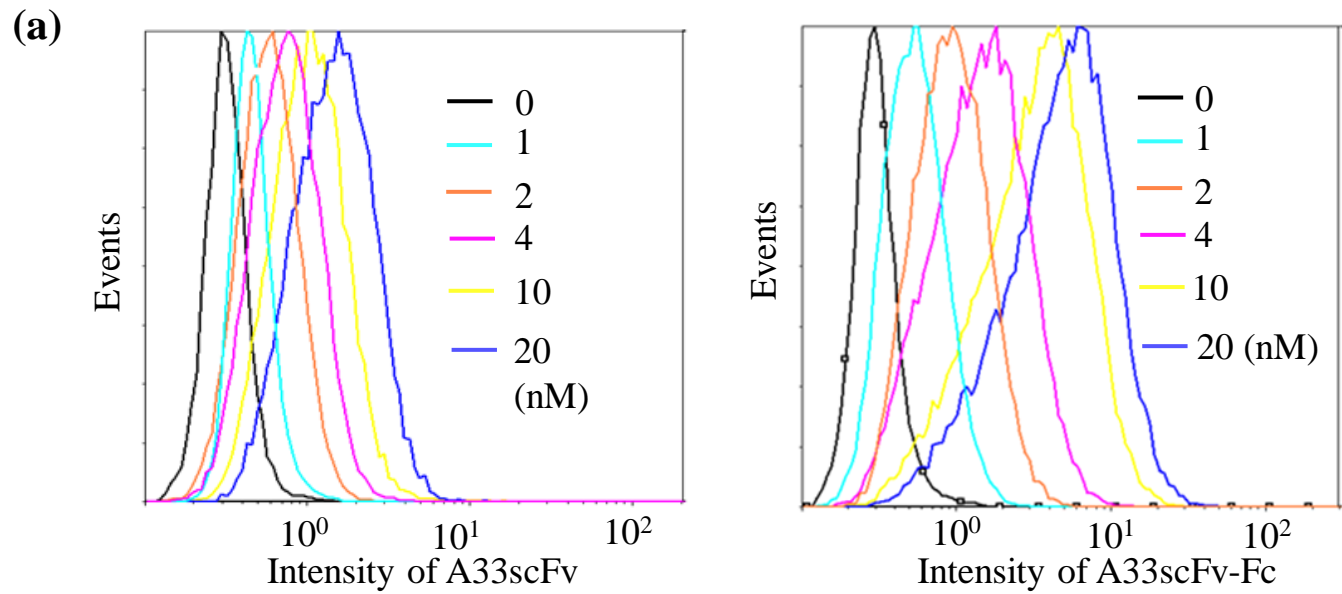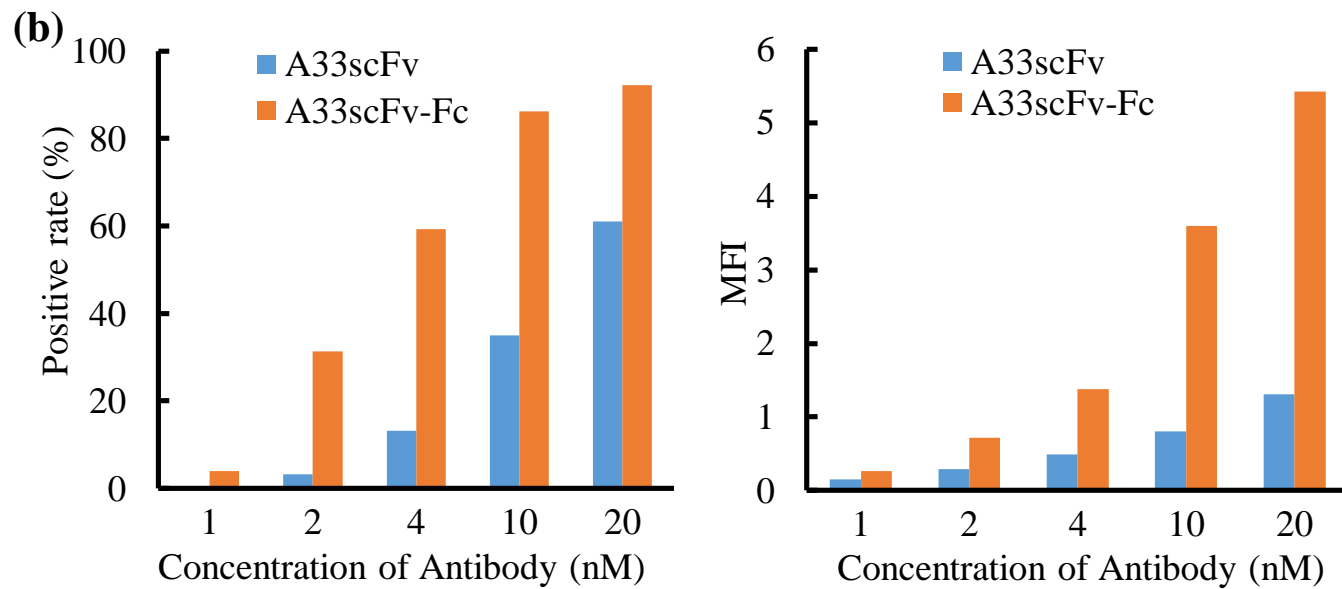

Supplement: f1 [file 505183.f1.pdf]
